# Supplementary material for: Cold tolerance identification of nine Rosa L. materials and expression patterns of genes related to cold tolerance in Rosa hybrida
Source: Frontiers journal article supplement (doi:10.3389/fpls.2023.1209134), 2023-06-27
Supplement: Data_Sheet_1.zip [file Data_Sheet_1.zip]

## Sheet: Sheet1
Supplemental Table 1 Special primers
Gene name	Forward primer (5’-3’)	Reverse primer (5’-3’)
WARKY33	AATCAGACTTTGGAGCAGCAT	GTCAACAGCAGCAATCGTG
PARS	TCTTCTCGCCCTCCATCT	TCTGGTTGCTCTTCCGACT
POD17	AAGAGGTCAATGAGGGAGGT	TTGGCAAGTTAAGGTAGGGA
HSD17B12	TTTTCTTCTCACCCTCCTTG	TTACCCTCCCATGCTTCTGG
NDUFA9	CCGTACTTGGGACGCTCAG	GCAGGCGATTACGAGGC
PMA1	GCAAAGTCATAATTTCCCTA	CCACAGATGCTGCTCGT
β-Amy1	TTTAAGTACCGGAAGTGTATCAG	CAGTTGGGTTGTGGAGGA
β-Amy1	ATTGGGCGTCCTGTGGC	ACGATTCCGGGATGGTT
glucose-6-phosphate 1-epimerase	ACCCATTAGAACCAGAAAGTCAAAG	TACAAGGAGATTGCTACTTCTGGAG
HPSE	CAGAAAGAGTGAGAGGTGATACAGA	TAGGTTCTAATGTAGGTATGTTCCC
GAPDH	TGAAGGGTGGTGCCAAGAA	AAGGGGAGCAAGACAGTTGG
UBI1	GGGCAATCTGGAAGTGCTCGT	GCCCCCAAAGAGAAACCCTGCG
ACT4	AAGGTGGTTGCCCCACCAGA	ACCAGAGAACAAGAATGCAAGCAGC
Note：product length：80-150 bp, Tm 60 ℃.
Table 2 Subordinate function values and sort of 9 Rosa L. materials
Material name	Membership function value	Sort
Rosa hybrida	0.479	2
Rosa rugosa ‘Yilanxiao’	0.411	6
Rosa maximowicziana	0.391	7
Rosa rugosa ‘Pingyin 12’	0.567	1
Rosa rugosa	0.468	3
Rosa multiflora	0.257	9
Rosa multiflora hybrida	0.304	8
Rosa wichurana‘Dian hong’	0.415	5
Rosa wichurian	0.42	4
Supplemental Table 3 The qualities of RNA samples
RNA sample name	Concentration（ng/ul）	A260/280	A260/230	Evaluation description
MGCL_1_12	973.7	2.11	2.1	Good RNA integrity
MGCL_2_13	586.3	2.07	2.07	Good RNA integrity
MGCL_3_14	545.9	2.03	1.54	Good RNA integrity
MGCK_1_15	455.2	2.02	1.85	Good RNA integrity
MGCK_2_18	448.5	2.01	1.16	Good RNA integrity
MGCK_3_19	227.5	1.94	1.56	Good RNA integrity
Supplemental Table 4 The quality of cDNA library
Sample code	Index	Conc.(ng/µL)	Conc .(nM)	Remaining volume (μl)	Fragment size (bp)	Comprehensive Evaluation
MGCL_1_12	ATCACG	6.26	27.09	20	350	Qualified
MGCL_2_13	CGATGT	4.65	20.14	20	350	Qualified
MGCL_3_14	TTAGGC	3.62	15.68	20	350	Qualified
MGCK_1_15	TGACCA	5.77	24.99	20	350	Qualified
MGCK_2_18	ACAGTG	8.68	37.56	20	350	Qualified
MGCK_3_19	GCCAAT	13.11	56.75	20	350	Qualified
Supplemental Table 5 Quality summary of original sequencing data
Sample	Raw sequence data	The amount of data	GC content（%）	Q20	Q30	Average quality
MGCK_1_15	31345002	4.702（GB）	46.89	0.9601	0.90895	37.985
MGCK_2_18	34731366	5.21（GB）	47.985	0.95885	0.9065	37.915
MGCK_3_19	29040668	4.356（GB）	47.445	0.9571	0.9047	37.87
MGCL_1_12	33567539	5.035（GB）	47.54	0.9563	0.8997	37.71
MGCL_2_13	28696200	4.304（GB）	47.64	0.96165	0.91145	38.055
MGCL_3_14	32969176	4.945（GB）	47.635	0.9603	0.9097	38.005
Note: The detection probability of Q20 and Q30 was 1/100 and 1/1000, indicating that the detection accuracy reached 99% and 99.9%.
Supplemental Table 6 Statistics of SNP
Sample	SNP quantity
MGCK_1_15	856070
MGCK_2_18	841711
MGCK_3_19	818838
MGCL_1_12	867092
MGCL_2_13	788911
MGCL_3_14	776355
Supplemental Table 7 Significant DEGs classification in KEGG
Branch	Classification	Number of pathways
Cellular Processes	Cell growth and death	2
Cellular Processes	Transport and catabolism	1
Environmental Information Processing	Signal transduction.	7
Genetic Information Processing	Folding, sorting and degradation	1
Genetic Information Processing	Replication and repair	5
Genetic Information Processing	Translation	4
Metabolism	Amino acid metabolism	2
Metabolism	Biosynthesis of other secondary metabolites	1
Metabolism	Carbohydrate metabolism	7
Metabolism	Energy metabolism	1
Metabolism	Glycan biosynthesis and metabolism	1
Metabolism	Metabolism of cofactors and vitamins	2
Metabolism	Lipid metabolism	5
Organismal Systems	Environmental adaptation	1
Organismal Systems	Immune system	3
Organismal Systems	Nervous system	2
Supplemental Table 8 KEGG pathway enrichment of significantly differentially expressed genes
Class	Pathway Name	Pathway ID	Gene Number
Cellular Processes; Cell growth and death	Cell cycle - yeast	ko04111	1
	Meiosis - yeast	ko04113	1
Cellular Processes; Transport and catabolism	Autophagy - yeast	ko04138	1
Environmental Information Processing; Signal transduction	MAPK signaling pathway - plant	ko04016	5
	NF-kappa B signaling pathway	ko04064	2
	Phosphatidylinositol signaling system	ko04070	1
	Sphingolipid signaling pathway	ko04071	1
	Plant hormone signal transduction	ko04075	1
	mTOR signaling pathway	ko04150	1
	AMPK signaling pathway	ko04152	1
Genetic Information Processing; Folding, sorting and degradation	RNA degradation	ko03018	2
Genetic Information Processing; Replication and repair	DNA replication	ko03030	1
	Nucleotide excision repair	ko03420	1
	Mismatch repair	ko03430	4
	Homologous recombination	ko03440	1
	Fanconi anemia pathway	ko03460	1
	Spliceosome	ko03040	3
Genetic Information Processing; Translation	Aminoacyl-tRNA biosynthesis	ko00970	1
	Ribosome biogenesis in eukaryotes	ko03008	1
	RNA transport	ko03013	6
Human Diseases; Cancers: Overview	Proteoglycans in cancer	ko05205	1
Human Diseases; Endocrine and metabolic diseases	Non-alcoholic fatty liver disease (NAFLD)	ko04932	2
Human Diseases; Infectious diseases: Bacterial	Pertussis	ko05133	2
	Tuberculosis	ko05152	2
Human Diseases; Infectious diseases: Parasitic	Leishmaniasis	ko05140	2
	Chagas disease (American trypanosomiasis)	ko05142	2
	Toxoplasmosis	ko05145	2
Human Diseases; Infectious diseases: Viral	Measles	ko05162	2
	Influenza A	ko05164	2
Human Diseases; Neurodegenerative diseases	Alzheimer's disease	ko05010	2
	Parkinson's disease	ko05012	2
	Huntington's disease	ko05016	2
Metabolism; Amino acid metabolism	Tyrosine metabolism	ko00350	1
	Phenylalanine metabolism	ko00360	1
Metabolism; Biosynthesis of other secondary Metabolites	Phenylpropanoid biosynthesis	ko00940	5
Metabolism; Glycan biosynthesis and metabolism	Glycosaminoglycan degradation	ko00531	1
Metabolism; Carbohydrate metabolism	Glycolysis / Gluconeogenesis	ko00010	1
	Fructose and mannose metabolism	ko00051	4
	Ascorbate and aldarate metabolism	ko00053	1
	Starch and sucrose metabolism	ko00500	5
	Amino sugar and nucleotide sugar metabolism	ko00520	2
	Inositol phosphate metabolism	ko00562	1
	Glyoxylate and dicarboxylate metabolism	ko00630	2
Metabolism; Energy metabolism	Oxidative phosphorylation	ko00190	4
Metabolism; Lipid metabolism	Fatty acid biosynthesis	ko00061	2
	Fatty acid elongation	ko00062	1
	Steroid hormone biosynthesis	ko00140	1
	Sphingolipid metabolism	ko00600	1
	Biosynthesis of unsaturated fatty acids	ko01040	1
Metabolism; Metabolism of cofactors and vitamins	Ubiquinone and other terpenoid-quinone biosynthesis	ko00130	2
	Porphyrin and chlorophyll metabolism	ko00860	1
Organismal Systems; Immune system	Toll-like receptor signaling pathway Toll	ko04620	2
	NOD-like receptor signaling pathway	ko04621	2
	Toll and Imd signaling pathway	ko04624	2
Organismal Systems; Nervous system	Neurotrophin signaling pathway	ko04722	2
	Retrograde endocannabinoid signaling	ko04723	2
Supplemental Table 9 Partial significant DEGs through KEGG pathway enrichment
Serial number	Gene name	Pathway name	Tendency	Pathway ID
1	WRKY33	MAPK signaling pathway - plant	up	ko04016
2	PARS	Aminoacyl-tRNA biosynthesis	up	ko00970
3	POD17	Phenylpropanoid biosynthesis	down	ko00940
4	HSD17B12	Biosynthesis of unsaturated fatty acids	down	ko01040
5	NDUFA9	Oxidative phosphorylation	down	ko00190
6	PMA1	Oxidative phosphorylation	down	ko00190
7	β-Amy1	Starch and sucrose metabolism	up	ko00500
8	β-Amy1	Starch and sucrose metabolism	up	ko00500
9	glucose-6-phosphate 1-epimerase	Glycolysis / Gluconeogenesis	up	ko00010
10	HPSE	Glycosaminoglycan degradation	up	ko00531
Supplemental Table 10 Expression stability of UBI1 and ACT4 analyzed by BestKeeper
Parameter	Gene
	UBI1	ACT4
Geo average value	26.68	24.4
AR average value	26.68	24.42
Minimum	25.66	22.5
Maxmum	27.8	28.62
Standard deviation	0.44	0.8
Coefficient of Variation（%）	1.66	3.29
x-fold minimum	-2.02	-3.71
x-fold maximum	2.18	18.73
x-fold standard deviation	1.36	1.74
Stability ranking	1	2
