# Supplementary material for: Cold tolerance identification of nine Rosa L. materials and expression patterns of genes related to cold tolerance in Rosa hybrida
Source: Frontiers journal article supplement (doi:10.3389/fpls.2023.1209134), 2023-06-27
Supplement: Data_Sheet_1.zip [file Data_Sheet_1.zip]

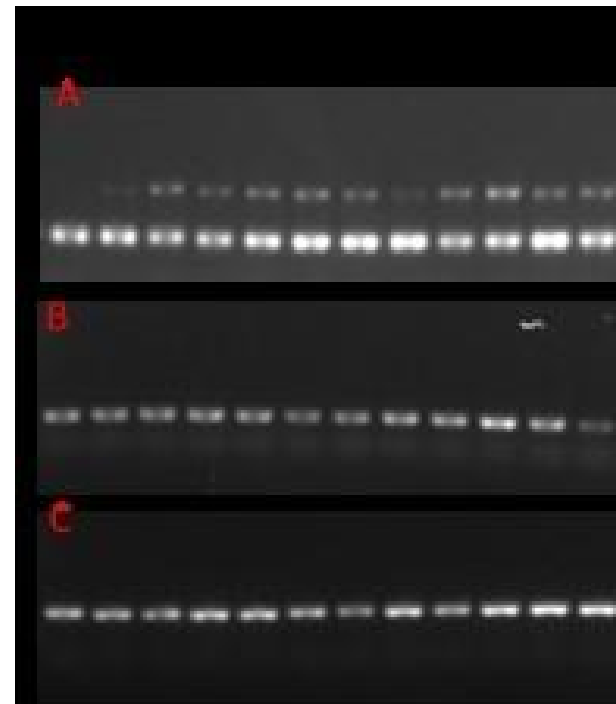

Semi quantitative of 3  
reference genes

Note: Fig A, B, C are  
gelograms of *GAPDH*,  
*ACT4*, *UBII*.

Supplemental Figure 3 Semi quantitative of 3 reference genes
