# Supplementary figures and images for: Cold tolerance identification of nine Rosa L. materials and expression patterns of genes related to cold tolerance in Rosa hybrida
Source: Frontiers journal article supplement (doi:10.3389/fpls.2023.1209134), 2023-06-27

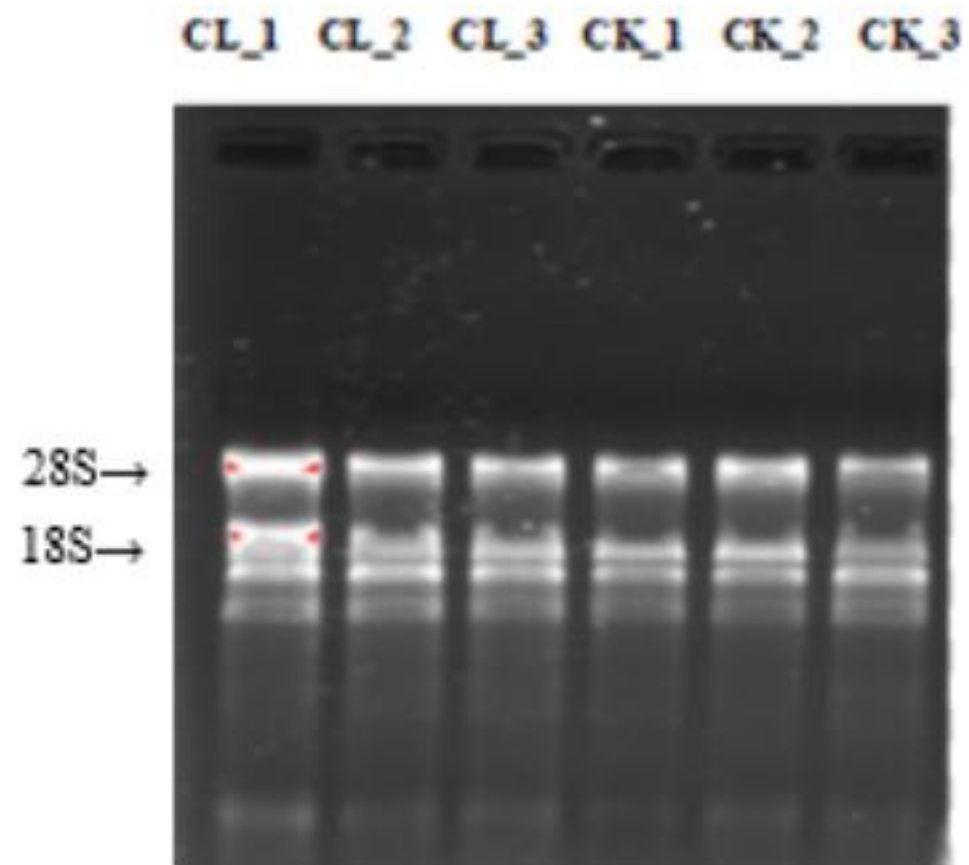

Supplemental Figure 1 Gel electrophoresis of sample RNA in RNA-Seq

Supplement: Data_Sheet_1.zip [file Data_Sheet_1.zip]

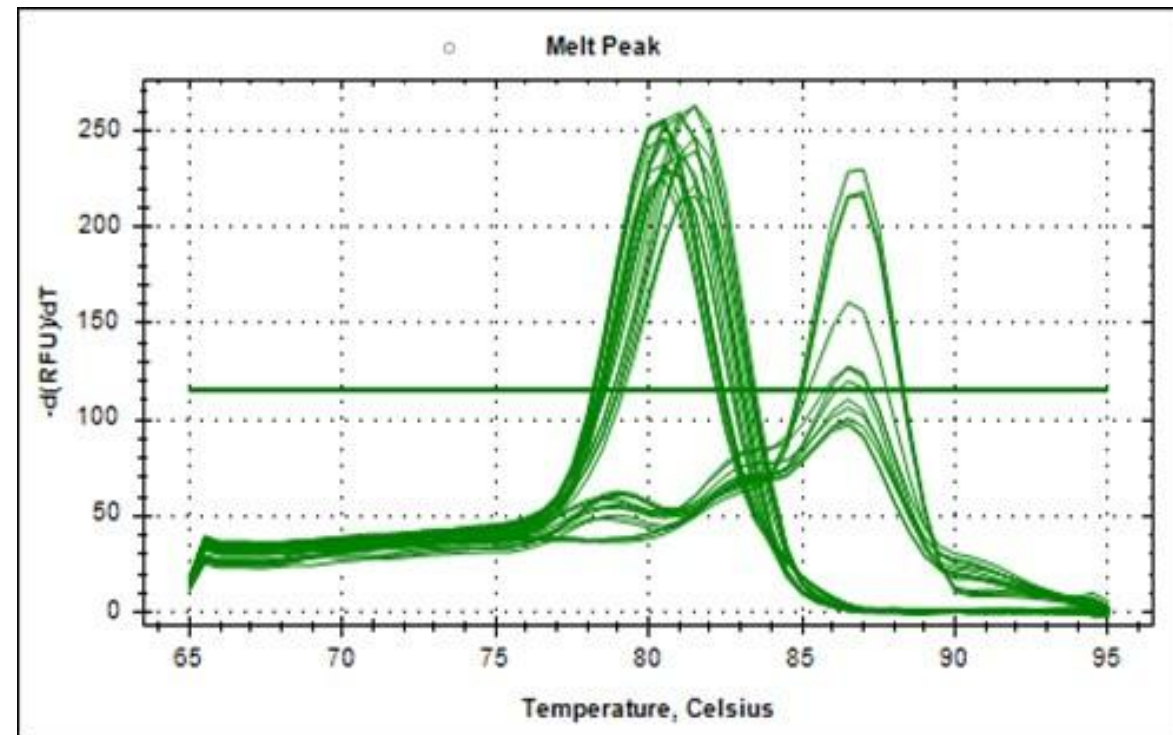

Supplemental Figure 2 Quantitative detection of cDNA library concentration by qPCR

Supplement: Data_Sheet_1.zip [file Data_Sheet_1.zip]
